# Supplementary material
Source: Copernicus journal article supplement (doi:10.5194/bg-23-3139-2026)
Supplement: Supplementary file 1 [file bg-23-3139-2026-supplement.pdf]

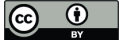

*Supplement of*

**Seafloor chemosynthetic habitats and AOM-influenced sediment microbiome at a cold-water coral site off the Vesterålen coast, northern Norway**

**Claudio Argentino et al.**

*Correspondence to:* Claudio Argentino (claudio.argentino@uit.no)

The copyright of individual parts of the supplement might differ from the article licence.

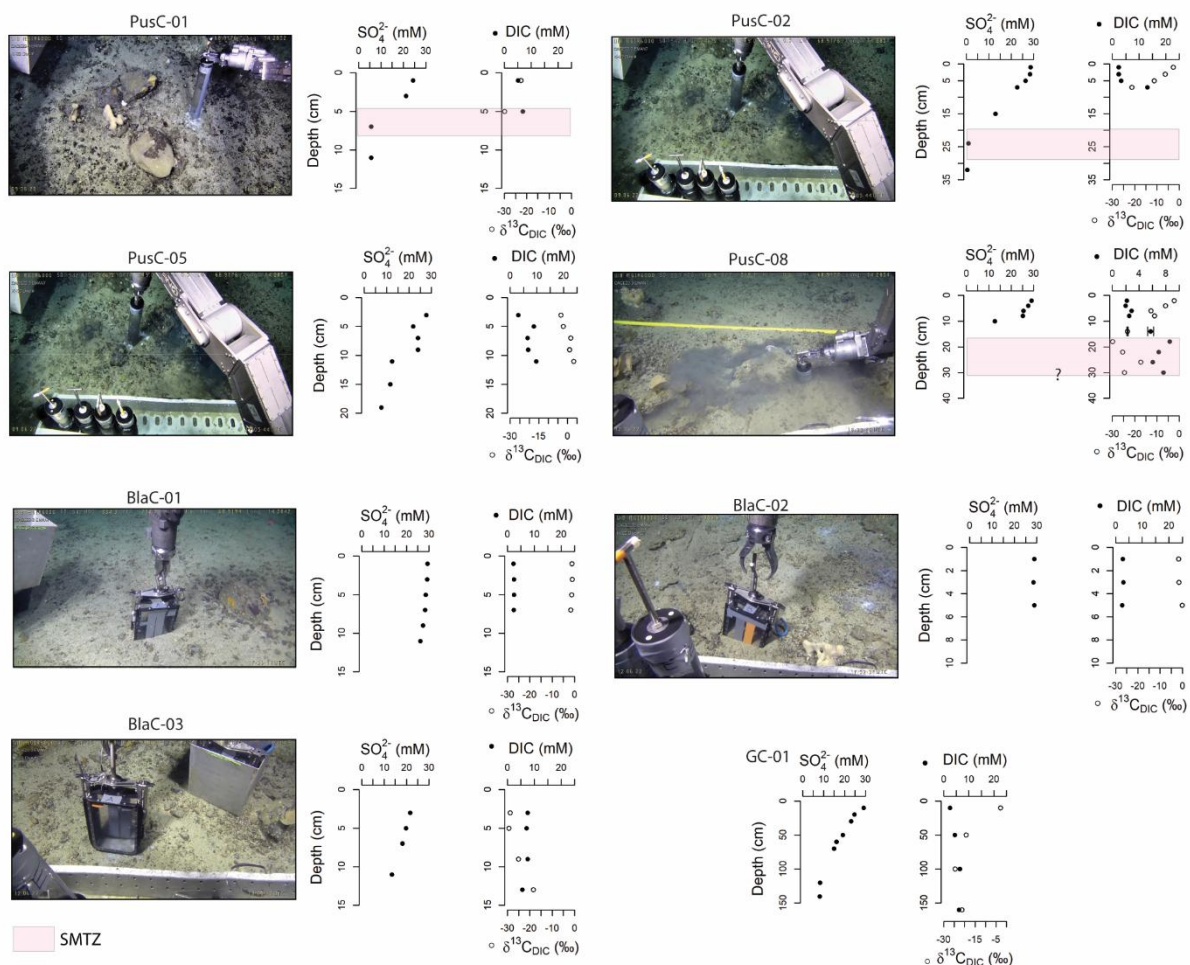

Fig. S1. Seafloor images and pore water geochemical profiles of all the sediment cores investigated in this study (PusC-04 and PusC-07 are shown in Fig. 3 of the main text). Locations are shown on the microbathymetry of Fig. 1C and on the mosaics and habitat maps of Fig. 2 (see main text). The sulfate-methane transition zone (SMTZ) is marked with pink color and identified in correspondence of a drop in sulfate concentrations and/or a decrease in  $\delta^{13}\text{C}_{\text{DIC}}$  coupled with an increase in DIC concentrations. Question mark at the base of the SMTZ in PusC-08 indicates uncertainty on the interpretation of its thickness due to missing pore water data. Error bars refer to standard uncertainty and correspond to one standard deviation.

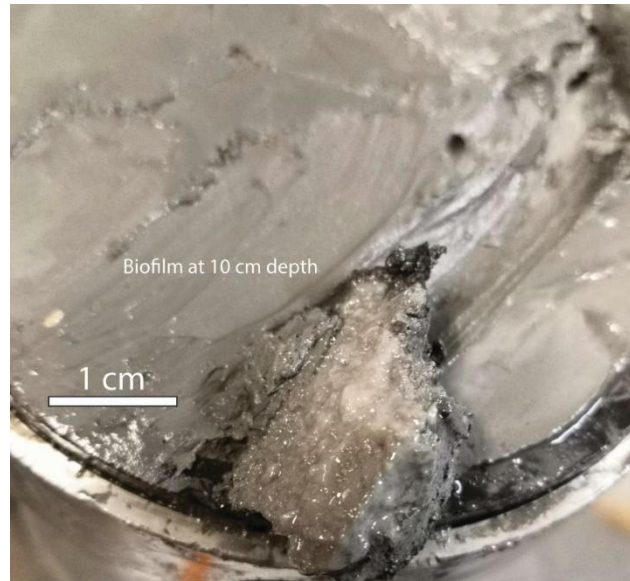

Fig. S2 Photograph of a white biofilm discovered onboard during slicing of PusC-08.

| Core              | Depth in the core (cm) | CH <sub>4</sub> (mM) |
|-------------------|------------------------|----------------------|
| PusC-01           | 26                     | 2.4                  |
| PusC-02           | 57                     | 3.7                  |
| PusC-04           | 54                     | 1.3                  |
| PusC-05           | 35                     | 2.7                  |
| PusC-07           | 45                     | 2.8                  |
| PusC-08           | 47                     | 2.0                  |
| BlaC-01           | 10                     | 0.005                |
| BlaC-01 replicate | 10                     | 0.002                |
| BlaC-02           | 5                      | 0.011                |
| BlaC-03           | 15                     | 1.2                  |

Table S1 Methane concentration in headspace gas samples from sediment cores.
